# Supplementary material for: Mycorrhizas drive the evolution of plant adaptation to drought
Source: PubMed Central journal article supplement (PMC10063553; doi:10.1038/s42003-023-04722-4), 2023-03-30
Supplement: 42003_2023_4722_MOESM2_ESM.pdf [file 42003_2023_4722_MOESM2_ESM.pdf]

Supplementary information for

**Mycorrhizas drive the evolution of plant adaptation to drought**

Marco Cosme

(marcosmeweb@gmail.com)

This PDF file includes:

Supplementary Fig. 1  
Supplementary Table 1

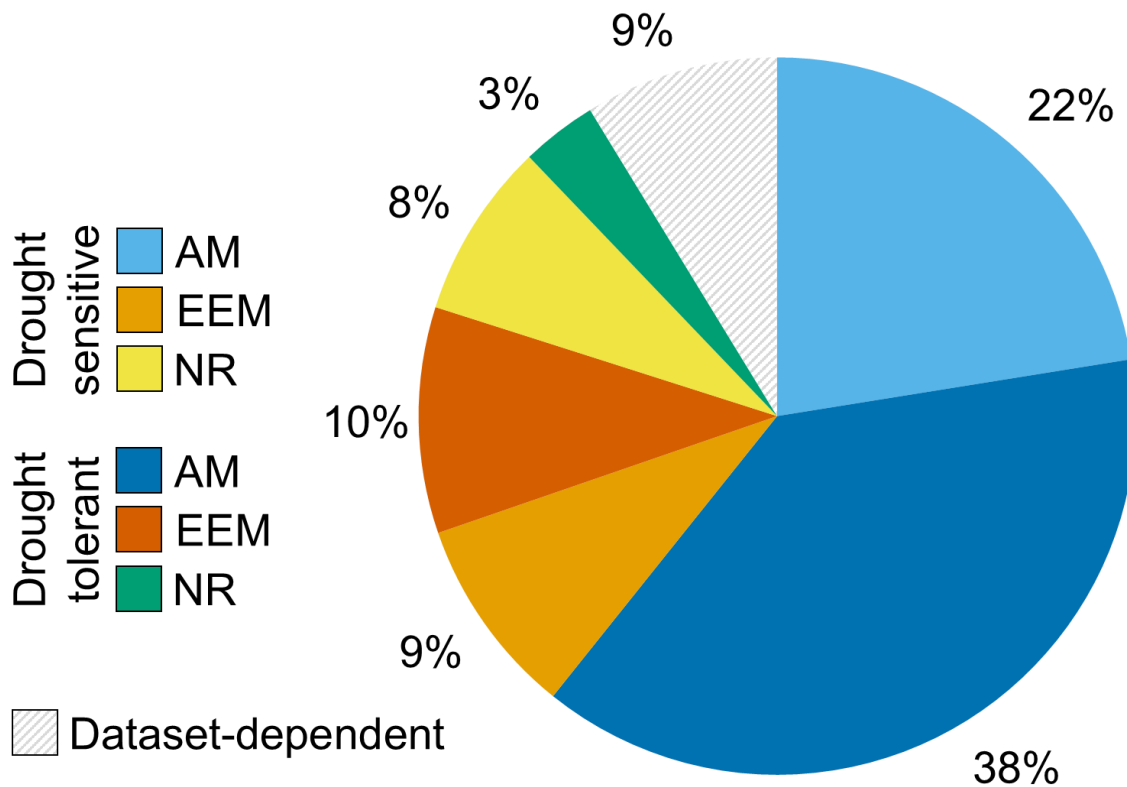

**Supplementary Fig. 1: Percent distribution of mycorrhizal strategy and drought adaptation states.**

The pie chart includes state data for 1,638 plant species (angiosperms and gymnosperms) colored according to their combined states of mycorrhizal strategy [AM, arbuscular mycorrhizal state; EEM, combined ectomycorrhizal and ericoid mycorrhizal state; NR, naked root state, i.e. non-mycorrhizal alone (dataset v5 and v6) or together with facultatively AM plants (dataset v1 to v4)] and drought adaptation (sensitive or tolerant), or a dataset-dependent state. The dataset-dependent state corresponds to assignments of mycorrhizal strategy and drought adaptation states varying according to dataset v1 to v6. The assembly of dataset v1 to v6 is summarized in Table 3 and described in the Methods.

**Supplementary Table 1** Rates of evolutionary transitions from a combined mycorrhizal strategy and drought adaptation state to another as estimated by the model best fitted to each dataset version.

| Hidden rate | Mycorrhizal strategy | Drought adaptation | Mycorrhizal strategy | Drought adaptation | Evolutionary transition rates (n° of transitions/Ma) |                          |                         |                          |                          |                          |                          |                          |                         |                          |                          |                         |                          |                         |                         |                          |                         |                         |                          |
|-------------|----------------------|--------------------|----------------------|--------------------|------------------------------------------------------|--------------------------|-------------------------|--------------------------|--------------------------|--------------------------|--------------------------|--------------------------|-------------------------|--------------------------|--------------------------|-------------------------|--------------------------|-------------------------|-------------------------|--------------------------|-------------------------|-------------------------|--------------------------|
|             |                      |                    |                      |                    | Dataset v1                                           |                          |                         | Dataset v2               |                          |                          | Dataset v3               |                          |                         | Dataset v4               |                          |                         | Dataset v5               |                         |                         | Dataset v6               |                         |                         |                          |
|             |                      |                    |                      |                    | Best                                                 | Lower CI                 | Upper CI                | Best                     | Lower CI                 | Upper CI                 | Best                     | Lower CI                 | Upper CI                | Best                     | Lower CI                 | Upper CI                | Best                     | Lower CI                | Upper CI                | Best                     | Lower CI                | Upper CI                |                          |
| <b>R1</b>   | <b>AM</b>            | <b>sensitive</b>   | →                    | <b>AM</b>          | <b>tolerant</b>                                      | <b>15,0102324145092</b>  | <b>15,0102324145092</b> | <b>17,3424010367719</b>  | <b>6,8234734895013</b>   | <b>5,3808676523914</b>   | <b>7,8566975704230</b>   | <b>13,6948208069163</b>  | <b>13,6948208069163</b> | <b>18,3887585183864</b>  | <b>2,1948551553455</b>   | <b>2,0765814405262</b>  | <b>2,1948551553455</b>   | <b>6,9997851076192</b>  | <b>5,0940088180811</b>  | <b>71,7652926218442</b>  | <b>6,9696099191187</b>  | <b>5,8047691485696</b>  | <b>18,0517693611206</b>  |
| R1          | AM                   | sensitive          | →                    | EEM                | sensitive                                            | 0,0003490751229          | 0,0002729099723         | 0,0003490751229          | 0,0000418488688          | 0,0000000009841          | 0,0004302991807          | 0,0000262122375          | 0,0000143213516         | 0,0001026275012          | 0,0000000010000          | 0,0000000000274         | 0,0000000019303          | 0,0002057800723         | 0,0000000021258         | 0,0003479593027          | 0,0002792103421         | 0,0000000011321         | 0,0010614107706          |
| R1          | AM                   | sensitive          | →                    | NR                 | sensitive                                            | 0,0008276380883          | 0,0005728233079         | 0,0011038911648          | 0,0007384780292          | 0,0007384780292          | 0,0008119570634          | 0,0010450006738          | 0,0010165831441         | 0,0013521855758          | 0,0000000010000          | 0,0000000002006         | 0,0000000021763          | 0,0011140510433         | 0,0000000006126         | 0,0018092829541          | 0,0011404178026         | 0,0001360275527         | 0,0011404178026          |
| <b>R1</b>   | <b>AM</b>            | <b>tolerant</b>    | →                    | <b>AM</b>          | <b>sensitive</b>                                     | <b>7,5477224125858</b>   | <b>7,5477224125858</b>  | <b>9,0009475801222</b>   | <b>3,3760262573811</b>   | <b>2,8971809121337</b>   | <b>3,5917122811357</b>   | <b>5,6108202741940</b>   | <b>5,6108202741940</b>  | <b>7,8850835698804</b>   | <b>1,3781914303773</b>   | <b>1,2767119447199</b>  | <b>1,3781914303773</b>   | <b>6,9997851076192</b>  | <b>5,0940088180811</b>  | <b>71,7652926218442</b>  | <b>6,9696099191187</b>  | <b>5,8047691485696</b>  | <b>18,0517693611206</b>  |
| R1          | AM                   | tolerant           | →                    | EEM                | tolerant                                             | 0,0004618452018          | 0,0002290125398         | 0,0005163526020          | 0,0009079602207          | 0,0008094841615          | 0,0009266698600          | 0,0005521349487          | 0,0005384115393         | 0,0007581632508          | 0,0000000010000          | 0,0000000006985         | 0,0000000021763          | 0,0002573510588         | 0,0000000008672         | 0,0007457345698          | 0,0001814158368         | 0,0000000012119         | 0,0007303845164          |
| R1          | AM                   | tolerant           | →                    | NR                 | tolerant                                             | 0,0000000010000          | 0,0000000007853         | 0,00000000089202         | 0,0000000010000          | 0,0000000004278          | 0,00000000031500         | 0,0000000010000          | 0,0000000002104         | 0,00000000037613         | 0,0009883751259          | 0,0009268472211         | 0,0011499680443          | 0,0000000010000         | 0,0000000005900         | 0,0002935183308          | 0,0000000010000         | 0,0000000007007         | 0,00000000096757         |
| R1          | EEM                  | sensitive          | →                    | AM                 | sensitive                                            | 0,0007933623592          | 0,0006376748772         | 0,0007933623592          | 0,0000600595324          | 0,0000000002991          | 0,0011294084895          | 0,0001078456690          | 0,0000000010343         | 0,0006665280445          | 0,0009655430086          | 0,0009001479162         | 0,0010087268541          | 0,0002057800723         | 0,0000000021258         | 0,0003479593027          | 0,0002792103421         | 0,0000000011321         | 0,0010614107706          |
| <b>R1</b>   | <b>EEM</b>           | <b>sensitive</b>   | →                    | <b>EEM</b>         | <b>tolerant</b>                                      | <b>57,0866902386243</b>  | <b>48,5912589962842</b> | <b>65,5652111010726</b>  | <b>174,6130998032230</b> | <b>149,2603376607140</b> | <b>202,8800764827220</b> | <b>100,0000000000000</b> | <b>90,2248468764835</b> | <b>116,7131872466280</b> | <b>40,0964859676181</b>  | <b>32,5957734301285</b> | <b>43,4575845274555</b>  | <b>73,8326087672995</b> | <b>33,7566240478965</b> | <b>105,8812989943900</b> | <b>73,8661872173341</b> | <b>38,2736703907384</b> | <b>219,0808321361410</b> |
| R1          | EEM                  | sensitive          | →                    | NR                 | sensitive                                            | 0,0000000010000          | 0,0000000009105         | 0,0013249448700          | 0,0000000010000          | 0,0000000006039          | 0,0000436577600          | 0,0000000010000          | 0,0000000005357         | 0,00000000089105         | 0,0000000010000          | 0,00000000020833        | 0,0000000020833          | 0,0000000010000         | 0,0000000004022         | 0,0001510912097          | 0,0000000010000         | 0,0000000006146         | 0,0001444615740          |
| R1          | EEM                  | tolerant           | →                    | AM                 | tolerant                                             | 0,0001063795454          | 0,0000000010961         | 0,0001063795454          | 0,0008125807985          | 0,0004655631666          | 0,0009132700748          | 0,0003462193140          | 0,0000000012141         | 0,0004293294743          | 0,0000000010289          | 0,0000000004702         | 0,0000000012998          | 0,0002573510588         | 0,0000000008672         | 0,0007457345698          | 0,0001814158368         | 0,0000000012119         | 0,0007303845164          |
| <b>R1</b>   | <b>EEM</b>           | <b>tolerant</b>    | →                    | <b>EEM</b>         | <b>sensitive</b>                                     | <b>100,0000000000000</b> | <b>80,1791178868410</b> | <b>102,4770919833460</b> | <b>82,3656568432239</b>  | <b>67,3327391319048</b>  | <b>84,2016676635451</b>  | <b>10,5863207218214</b>  | <b>8,8127342711643</b>  | <b>11,7615045183466</b>  | <b>100,0000000000000</b> | <b>85,6126080519972</b> | <b>102,8593688631690</b> | <b>73,8326087672995</b> | <b>33,7566240478965</b> | <b>105,8812989943900</b> | <b>73,8661872173341</b> | <b>38,2736703907384</b> | <b>219,0808321361410</b> |
| R1          | EEM                  | tolerant           | →                    | NR                 | tolerant                                             | 0,0000000010000          | 0,0000000006933         | 0,0000000016227          | 0,0000000010000          | 0,0000000004598          | 0,0000000038168          | 0,0000000010000          | 0,0000000007104         | 0,0000000011598          | 0,0000000009747          | 0,0000000005330         | 0,0000000010064          | 0,0000000010000         | 0,0000000006657         | 0,0001566484589          | 0,0000000010000         | 0,0000000006039         | 0,000126599833           |
| R1          | NR                   | sensitive          | →                    | AM                 | sensitive                                            | 0,0000000010000          | 0,0000000003474         | 0,0000000020995          | 0,0000000009113          | 0,0000000004278          | 0,0000000066486          | 0,0000000010000          | 0,0000000007104         | 0,0000000023907          | 0,0000000010000          | 0,0000000007824         | 0,0007738851817          | 0,0011140510433         | 0,0000000006126         | 0,0018092829541          | 0,0011404178026         | 0,0001360275527         | 0,0011404178026          |
| R1          | NR                   | sensitive          | →                    | EEM                | sensitive                                            | 0,0000000010000          | 0,0000000006704         | 0,0000000013090          | 0,0006517535544          | 0,0003056499674          | 0,0007799754180          | 0,0006342389736          | 0,0004529134661         | 0,0009494572452          | 0,0000000010000          | 0,0000000009384         | 0,0000000019324          | 0,0000000010000         | 0,0000000004022         | 0,0001510912097          | 0,0000000010000         | 0,0000000006146         | 0,0001444615740          |
| <b>R1</b>   | <b>NR</b>            | <b>sensitive</b>   | →                    | <b>NR</b>          | <b>tolerant</b>                                      | <b>0,1066335745126</b>   | <b>0,0661298048432</b>  | <b>0,1066335745126</b>   | <b>0,1262416415964</b>   | <b>0,1064597016694</b>   | <b>0,2615759651859</b>   | <b>0,1294019985400</b>   | <b>0,1248563596825</b>  | <b>0,1306631364456</b>   | <b>0,1206093416361</b>   | <b>0,0947197121607</b>  | <b>0,1301131841256</b>   | <b>0,0815981466907</b>  | <b>0,0597364288679</b>  | <b>0,1027488506906</b>   | <b>0,0811767340140</b>  | <b>0,0811767340140</b>  | <b>0,1485761364000</b>   |
| R1          | NR                   | sensitive          | →                    | AM                 | tolerant                                             | 0,0000000010000          | 0,0000000002648         | 0,0000000018818          | 0,0000000010000          | 0,0000000001288          | 0,0004302991807          | 0,0000000010000          | 0,0000000002375         | 0,00000000054154         | 0,0000000010000          | 0,0000000008140         | 0,0000000018112          | 0,0000000010000         | 0,0000000005900         | 0,0002935183308          | 0,0000000010000         | 0,0000000007007         | 0,00000000096757         |
| R1          | NR                   | tolerant           | →                    | EEM                | tolerant                                             | 0,0000000010000          | 0,0000000005684         | 0,0000000052301          | 0,0000000010000          | 0,0000000002991          | 0,0009132714950          | 0,0000000010000          | 0,0000000010000         | 0,0000000030248          | 0,0000000010000          | 0,0000000002800         | 0,0000000012568          | 0,0000000010000         | 0,0000000006657         | 0,0001566484589          | 0,0000000010000         | 0,0000000006039         | 0,000126599833           |
| <b>R1</b>   | <b>NR</b>            | <b>tolerant</b>    | →                    | <b>NR</b>          | <b>sensitive</b>                                     | <b>0,7498495911490</b>   | <b>0,5152852426200</b>  | <b>0,7498495911490</b>   | <b>0,8602001065544</b>   | <b>0,7961327663454</b>   | <b>1,8378362284065</b>   | <b>0,8981060052513</b>   | <b>0,8981060052513</b>  | <b>0,9722134895849</b>   | <b>0,7873922443785</b>   | <b>0,7873922443785</b>  | <b>0,9511394888041</b>   | <b>0,0815981466907</b>  | <b>0,0597364288679</b>  | <b>0,1027488506906</b>   | <b>0,0811767340140</b>  | <b>0,0811767340140</b>  | <b>0,1485761364000</b>   |
| <b>R2</b>   | <b>AM</b>            | <b>sensitive</b>   | →                    | <b>AM</b>          | <b>tolerant</b>                                      | <b>0,0366920848535</b>   | <b>0,0245135949179</b>  | <b>0,0366920848535</b>   | <b>0,0388090173548</b>   | <b>0,0344788508381</b>   | <b>0,0521323063676</b>   | <b>0,0502824219686</b>   | <b>0,0502824219686</b>  | <b>0,0532689760045</b>   | <b>0,0105484192083</b>   | <b>0,0105484192083</b>  | <b>0,0125742614836</b>   | <b>0,0000000010000</b>  | <b>0,0000000006126</b>  | <b>0,0003479593027</b>   | <b>0,0000000010000</b>  | <b>0,0000000007375</b>  | <b>0,0004428363627</b>   |
| R2          | AM                   | sensitive          | →                    | EEM                | sensitive                                            | 0,0000000010000          | 0,0000000010000         | 0,0000000016394          | 0,0000000010000          | 0,0000000004278          | 0,0000148306324          | 0,0000000010000          | 0,0000000002313         | 0,00000000049757         | 0,0000000010000          | 0,0000000000281         | 0,0000000014688          | 0,0000000010000         | 0,0000000004868         | 0,0003234773079          | 0,0000000010000         | 0,000000000830          | 0,0008091672183          |
| R2          | AM                   | sensitive          | →                    | NR                 | sensitive                                            | 0,0058483432567          | 0,0052852589093         | 0,0067934273123          | 0,0061947008406          | 0,0051084617075          | 0,0063709681814          | 0,0048650837535          | 0,0038796550044         | 0,0059991556979          | 0,0091985627085          | 0,0082065361260         | 0,0135974982305          | 0,0082668012088         | 0,0061083973930         | 0,0111766309736          | 0,0082481098625         | 0,0078487532713         | 0,0120720077626          |
| <b>R2</b>   | <b>AM</b>            | <b>tolerant</b>    | →                    | <b>AM</b>          | <b>sensitive</b>                                     | <b>0,0489583449820</b>   | <b>0,0479735848480</b>  | <b>0,0596604077385</b>   | <b>0,0554485510397</b>   | <b>0,0401364534980</b>   | <b>0,0801056798049</b>   | <b>0,0653851111476</b>   | <b>0,0620305220289</b>  | <b>0,0677085717907</b>   | <b>0,0000000010000</b>   | <b>0,0000000002536</b>  | <b>0,0000000016942</b>   | <b>0,0000000010000</b>  | <b>0,0000000006126</b>  | <b>0,0003479593027</b>   | <b>0,0000000010000</b>  | <b>0,0000000007375</b>  | <b>0,0004428363627</b>   |
| R2          | AM                   | tolerant           | →                    | EEM                | tolerant                                             | 0,0007723557263          | 0,0006313620846         | 0,0010747654195          | 0,0000000009866          | 0,0000000002991          | 0,0000000056992          | 0,0010028382357          | 0,0005384115393         | 0,0010511648362          | 0,0018344391651          | 0,0018344391651         | 0,0022286451946          | 0,0009307564292         | 0,0000000007855         | 0,0017319467551          | 0,0009407334872         | 0,0000000011734         | 0,0012542654083          |
| R2          | AM                   | tolerant           | →                    | NR                 | tolerant                                             | 0,0027151072318          | 0,0023731036713         | 0,0040246741695          | 0,0026771970502          | 0,0014565905671          | 0,0038761441228          | 0,0019919112258          | 0,0017637988161         | 0,0020242392198          | 0,0009108985259          | 0,0007012429860         | 0,0009342130093          | 0,0000000010000         | 0,0000000005551         | 0,0002935134715          | 0,0000000010000         | 0,0000000006804         | 0,0001266001888          |
| R2          | EEM                  | sensitive          | →                    | AM                 | sensitive                                            | 0,0000000010000          | 0,0000000006631         | 0,0000000020785          | 0,0000000010000          | 0,0000000010000          | 0,0017676373393          | 0,0007155287654          | 0,0004557831856         | 0,0010309073271          | 0,0000000010000          | 0,0000000007824         | 0,0025691465823          | 0,0000000010000         | 0,0000000004868         | 0,0003234773079          | 0,0000000010000         | 0,000000000830          | 0,0008091672183          |
| <b>R2</b>   | <b>EEM</b>           | <b>sensitive</b>   | →                    | <b>EEM</b>         | <b>tolerant</b>                                      | <b>0,9950528615947</b>   | <b>0,9085612184972</b>  | <b>1,0323001516767</b>   | <b>26,5869569521618</b>  | <b>25,9521911800217</b>  | <b>34,0360455983783</b>  | <b>34,6950494182448</b>  | <b>32,3374418804419</b> | <b>38,3817146406614</b>  | <b>7,5104418883213</b>   | <b>7,5104418883213</b>  | <b>9,2998488377663</b>   | <b>0,0365772268929</b>  | <b>0,0335832820957</b>  |                          |                         |                         |                          |
